# Supplementary material for: Origins of contrasting copper coordination geometries in crystalline copper sulfate pentahydrate
Source: Royal Society of Chemistry journal article supplement (doi:10.1039/c5cp05554g), 2015-01-01
Supplement: c5cp05554g1.pdf [file c5cp05554g1.pdf]

## Origins of Contrasting Copper Coordination Geometries in Crystalline Copper Sulfate Pentahydrate

Michael T. Ruggiero<sup>†</sup>, Alessandro Erba<sup>‡</sup>, Roberto Orlando<sup>‡</sup>, and Timothy M. Korter<sup>†\*</sup>

<sup>†</sup> *Department of Chemistry, Syracuse University, 1-014 Center for Science and Technology, Syracuse, NY 13244-4100, United States*

<sup>‡</sup> *Dipartimento di Chimica and Centre of Excellence Nanostructured Interfaces and Surfaces, Università di Torino, via Giuria 5, IT-10125 Torino, Italy*

\*tmkorter@syr.edu

**Table S1: Experimental single-crystal XRD fractional atomic coordinates for CuSO<sub>4</sub>·5H<sub>2</sub>O. The crystals have  $P\bar{1}$  space group symmetry, and lattice dimensions of:  $a = 6.106 \text{ \AA}$ ,  $b = 10.656 \text{ \AA}$ ,  $c = 5.969 \text{ \AA}$ ,  $\alpha = 77.332^\circ$ ,  $\beta = 82.433^\circ$ ,  $\gamma = 72.523^\circ$ , and  $V=360.548 \text{ \AA}^3$**

| Atom | X/A    | Y/B     | Z/C    |
|------|--------|---------|--------|
| Cu   | 0.5000 | 1.0000  | 0.5000 |
| Cu   | 0.5000 | 0.5000  | 1.0000 |
| S    | 0.8741 | 0.5140  | 0.7140 |
| O    | 0.7032 | 0.7469  | 0.6832 |
| O    | 0.4804 | 1.2569  | 0.5826 |
| O    | 0.7955 | 1.0345  | 0.4056 |
| H    | 0.8400 | 1.1540  | 0.3820 |
| H    | 0.9110 | 0.9250  | 0.3920 |
| O    | 0.8257 | 0.4056  | 0.8488 |
| O    | 0.3491 | 0.7900  | 0.8822 |
| O    | 0.3522 | 0.3159  | 0.9257 |
| H    | 0.2870 | 0.2300  | 0.9790 |
| H    | 0.2600 | 0.3800  | 0.8690 |
| O    | 1.1154 | 0.5431  | 0.6999 |
| O    | 0.8632 | 0.3620  | 0.6264 |
| O    | 0.1299 | 0.0679  | 0.1244 |
| H    | 0.1650 | -0.0760 | 0.1300 |
| H    | 0.1940 | 0.0860  | 0.1840 |
| H    | 0.3570 | 1.3420  | 0.6120 |
| H    | 0.5830 | 1.2990  | 0.5920 |
| H    | 0.2290 | 0.8150  | 0.8760 |
| H    | 0.4290 | 0.8020  | 0.8070 |

**Table S.2: Details of the experimental structure refinement of CuSO<sub>4</sub>·5H<sub>2</sub>O.**

| Parameter                             | Value                        |
|---------------------------------------|------------------------------|
| Temperature                           | 90 K                         |
| Radiation Type                        | Molybdenum K <sub>α</sub>    |
| F (0 0 0)                             | 246                          |
| Crystal Size                          | 0.21 x 0.14 x 0.10           |
| Reflections Collected                 | 21157                        |
| <i>R</i> indices ( $I > 2\sigma(I)$ ) | $R_1=0.0420$ , $wR_2=0.0586$ |
| <i>R</i> indices (all data)           | $R_1=0.0607$ , $wR_2=0.0627$ |
| Goodness-of-fit on F <sup>2</sup>     | 1.016                        |
